## RESEARCH ARTICLE

# Lung development, repair and cancer: A study on the role of *MMP20* gene in adenocarcinoma

Pooi Ling Mok<sup>1,2,3,4</sup>\*, Arun Neela Kumar Anandasayanam<sup>5</sup>, Hernandez Maradiaga Oscar David<sup>5</sup>, Jiabei Tong<sup>5</sup>, Aisha Farhana<sup>1</sup>, Mohammed Safwan Ali Khan<sup>6,7</sup>, Gothai Sivaprakasam<sup>5</sup>, Avin Ee-Hwan Koh<sup>2</sup>, Badr Alzahrani<sup>1</sup>

**1** Department of Clinical Laboratory Sciences, College of Applied Medical Sciences, Jouf University, Sakaka, Aljouf Province, Saudi Arabia, **2** Department of Biomedical Science, Faculty of Medicine and Health Sciences, Universiti Putra Malaysia, UPM Serdang, Selangor, Malaysia, **3** Genetics and Regenerative Medicine Research Group, Universiti Putra Malaysia, UPM Serdang, Selangor, Malaysia, **4** Department of Biotechnology, Bharath Institute of Higher Education and Research, Chennai, Tamil Nadu, India, **5** Department of Medical Microbiology and Parasitology, Universiti Putra Malaysia, UPM Serdang, Selangor, Malaysia, **6** Department of Biomedical Sciences, School of Medicine, Nazarbayev University, Nur-Sultan, Kazakhstan, **7** Department of Pharmacology, Hamidiye International Faculty of Medicine, University of Health Sciences, Uskudar, Istanbul, Turkey

\* These authors contributed equally to this work.

\* [mpling@ju.edu.sa](mailto:mpling@ju.edu.sa), [rachelmok2005@gmail.com](mailto:rachelmok2005@gmail.com)

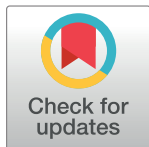

## OPEN ACCESS

**Citation:** Mok PL, Anandasayanam ANK, Oscar David HM, Tong J, Farhana A, Khan MSA, et al. (2021) Lung development, repair and cancer: A study on the role of *MMP20* gene in adenocarcinoma. PLoS ONE 16(4): e0250552. <https://doi.org/10.1371/journal.pone.0250552>

**Editor:** Kalimuthusamy Natarajaseenivasan, Bharathidasan University, INDIA

**Received:** January 19, 2021

**Accepted:** April 11, 2021

**Published:** April 29, 2021

**Copyright:** © 2021 Mok et al. This is an open access article distributed under the terms of the [Creative Commons Attribution License](https://creativecommons.org/licenses/by/4.0/), which permits unrestricted use, distribution, and reproduction in any medium, provided the original author and source are credited.

**Data Availability Statement:** All relevant data are within the manuscript.

**Funding:** The funding of this study is supported by the Deanship of Scientific Research, Jouf University, through research grant no. 40/G/03.

**Competing interests:** The authors have declared that no competing interests exist.

## Abstract

Multiple matrix metalloproteinases have significant roles in tissue organization during lung development, and repair. Imbalance of proteinases may lead to chronic inflammation, changes in tissue structure, and are also highly associated to cancer development. The role of *MMP20* is not well studied in lung organogenesis, however, it was previously shown to be present at high level in lung adenocarcinoma. The current study aimed to identify the functional properties of *MMP20* on cell proliferation and motility in a lung adenocarcinoma in vitro cell model, and relate the interaction of *MMP20* with other molecular signalling pathways in the lung cells after gaining tumoral properties. In this study, two different single guide RNA (sgRNAs) that specifically targeted on *MMP20* sites were transfected into human lung adenocarcinoma A549 cells by using CRISPR-Cas method. Following that, the changes of *PI3-K*, *survivin*, and *MAP-K* mRNA gene expression were determined by Real-Time Polymerase Chain Reaction (RT-PCR). The occurrence of cell death was also examined by Acridine Orange/Propidium Iodide double staining. Meanwhile, the motility of the transfected cells was evaluated by wound healing assay. All the data were compared with non-transfected cells as a control group. Our results demonstrated that the transfection of the individual sgRNAs significantly disrupted the proliferation of the A549 cell line through suppression in the gene expression of *PI3-K*, *survivin*, and *MAP-K*. When compared to non-transfected cells, both experimental cell groups showed reduction in the migration rate, as reflected by the wider gaps in the wound healing assay. The current study provided preliminary evidence that *MMP20* could have regulatory role on stemness and proliferative genes in the lung tissues and affect the cell motility. It also supports the notion that targeting *MMP20* could be a potential treatment mode for halting cancer progression.

## 1.0 Introduction

Lung organogenesis studies have observed spatiotemporal expression of multiple matrix metalloproteinases (MMPs) and are tightly regulated. The lung is highly exposed to physical, chemical or biological insults. The resurgence of MMPs as a response to lung tissue injury implies that these molecules may protect and help to restore tissue structure and function by modulating immune response [1], and activating tissue repair processes [2]. Failure to reverse DNA damage incurred by certain agents, for example, nicotine in tobacco smoking can result in lung cell dysplasia [3, 4].

Lung adenocarcinoma resistant to epidermal growth factor receptor tyrosine kinase inhibitors *EGFR*-TKI is linked to *MMP1*, which is proposed to have a pivotal role in migration and invasion [5]. Additionally, *MMP2* and *MMP9* orchestrate invasion and metastasis in A549 cells and the expression of both proteins are significantly higher in lung adenocarcinoma compared with normal tissue surrounding the tumour [6, 7].

*MMP20* is present in the chromosome 11q22.3 and it was considered confined to the oral cavity, important for tooth formation [8, 9]. Much is unknown about the role of *MMP20* and its gene expression has been reported to maintain at same level throughout lung development [2]. However, a recent study showed that it is highly expressed in lung adenocarcinoma [10]. It is therefore, interesting to study the interaction of *MMP20* with other signalling molecules involved in lung cell proliferation after gaining tumoral properties.

In this study, we hypothesized that *MMP20* participates in lung cell maintenance by regulating signalling pathways involved in cell stemness and proliferation. To prove this, we aimed to determine the downstream effect on the A549 lung adenocarcinoma cell proliferation following knock-down of *MMP20* gene expression by using CRISPR-Cas9 method. The fold changes of *phosphoinositide 3-kinase (PI3-K)*, *survivin* and *mitogen-activated protein kinase (MAPK)* gene expression were determined and compared with untreated cell line. In addition, the cell migration activity was also evaluated by wound healing assay.

## 2.0 Materials and methods

### 2.1 Cell culture

The human lung adenocarcinoma A549 cell line in vial format (P5) was obtained from the National Institute of Health (IMR), Selangor, Malaysia. The cells were thawed and cultured in 25 cm<sup>2</sup> flasks in Roswell Park Memorial Institute 1640 Medium (RPMI 1640; [Nacalai Tesque Inc.; Kyoto, Japan](#)) supplemented with 10% Fetal Bovine Serum (FBS) (Gibco; USA) and 1% penicillin/streptomycin (Nacalai Tesque Inc.) at 37°C in an incubator with 95% air and 5% carbon dioxide (CO<sub>2</sub>). The cell growth was monitored and once it reached 80% confluency, the cells were subsequently sub-cultured into new flasks at a ratio of 1:3.

### 2.2 Guide RNA

Two pre-designed synthetic guide RNAs (sgRNA) targeting for human *MMP20* gene were purchased from Integrated DNA Technologies (IDT; Singapore). Hs.Cas9.MMP20.1.AA (5' -GGUCUAACUCCCCGGUGACU-3') targets on the position of 102616920 on the positive strand, while Hs.Cas9.MMP20.1.AB (5' -GGGAUCCUAUCCAUCGAU-3') targets on the position of 102610004 on the negative strand of the *MMP20* gene.

### 2.3 Transfection

One day before transfection, 1 x 10<sup>4</sup> A549 cells were seeded into a 96-well plate and incubated at 37°C in a CO<sub>2</sub> incubator. On the next day, two microcentrifuge tubes were prepared for

lipofection experiment. In the first tube, 5  $\mu$ l Opti MEM medium, 0.05  $\mu$ l Cas9 protein, 1.5  $\mu$ l MMP20 gRNA and 0.5  $\mu$ l Lipofectamine Cas9 reagent were added and gently mixed. Then, the second tube containing 5  $\mu$ l Opti MEM medium was prepared and added with 0.3  $\mu$ l lipofectamine CRISPRMAX reagent. The second tube was incubated at room temperature (25°C) for 1 min. After one minute, the content of both tubes was mixed together and allowed to further incubate at room temperature for 15 min. Then, 10  $\mu$ l of the complex mixture was gently added to each 96-well containing the cells. The plate was placed in the CO<sub>2</sub> incubator for 2 days. After that, the culture medium was gently removed and the cells were rinsed with 50  $\mu$ L of PBS. The cells were harvested for further downstream experiments. For non-transfected control group, the gRNA was replaced with deionized water.

## 2.4 RNA extraction and quantitative PCR (qPCR)

Total RNA was extracted from transfected and non-transfected A549 cells using the RNeasy® Mini kit (QIAGEN) according to the manufacturer's instructions. The RNA was first reverse transcribed to cDNA (Takara Biotechnology Co., Ltd.; Dalian, China) before the expression levels of *PI3-K*, *survivin* and *MAP-K* were determined by quantitative RT-PCR using THUNDERBIRD® SYBR® qPCR Mix (Toyobo; Osaka, Japan). The reaction was performed on Light Cycler® 480 Real-Time PCR System (Roche Molecular Systems; California, USA), and the results were normalised with the expression of  $\beta$ -Actin (internal control). The primer pairs were synthesised by MyTACG Bioscience (Malaysia) and the sequences were described as follows: *PI3-K* (182 bp) forward: 5' -GGTGAAGCTCGTGTGTGGA-3' ; reverse: 5' -GAAGACAGGGCTCCACTTCC-3' ; *survivin* (103 bp) forward: 5' -CCAGACGATGACCCATGGAC-3' ; reverse: 5' -TGAAGAAGTCTGCCACCGTC-3' ; *MAP-K* (187 bp) forward: 5' -CAGTTCTTGACCCCTGGTCC-3' ; reverse: 5' -GTACATACTGCCGCAGGTCA-3' ;  $\beta$ -actin (72 bp) forward: 5' -GACAGGATGCAGAAGGAGATCACT-3' ; reverse: 5' -CTAAGGAGGAGCAATGATCTTGAT-3' . The relative mRNA expression was calculated according to the 2<sup>- $\Delta\Delta$ Ct</sup> method.

## 2.5 Wound healing assay

Wound healing assay was performed to measure the migration potential of wild type A549 cells and transfected A549 cells. In brief, 1 x 10<sup>6</sup> A549 lung cancer cells were seeded into a 12-well plate on Day 0 and incubated at 37°C and 5% CO<sub>2</sub> for 24 h until confluency in the monolayer was achieved. With the help of a sterile micropipette tip, a scratch was made on the cell monolayer of all groups, then the wound width was observed at 40 x total magnification and pictures were taken. Then, transfections with the respective sgRNA (Hs.Cas9.MMP20.1.AA and Hs.Cas9.MMP20.1.AB) were performed according to the protocols described above. The transfected and non-transfected cells were incubated in a CO<sub>2</sub> incubator for 48 h, the assay was performed in triplicate. After that, the micrograph pictures showing areas of scratch wound were taken. The length (distance) of cell migration was measured and analysed using ImageJ software and compared for all test groups. The formula below was used to calculate the rate of cell migration and the value was reported in the unit of nm per hour (nm/h):

$$RM = \frac{Wi - Wf}{t}$$

*RM* = Rate of cell migration (nm/h)

*Wi* = Initial wound width (nm)

*Wf* = Final wound width (nm)

*t* = Duration of migration (hour)

## 2.6 Cell viability determination

Post-transfection cell viability was evaluated by Acridine Orange/Propidium Iodide (AO/PI) double staining. The non-transfected and transfected cells were harvested and stained by mixing 10  $\mu$ L of cellular pellet with a solution containing 10  $\mu$ L AO/10  $\mu$ L PI (1 mg/mL). The stained cells were gently pipetted onto a glass slide and covered with a cover slip before evaluation under a fluorescence microscope. The fluorescence microscopy was all performed within 30 min.

To determine possible cytotoxic effect of each component used in the transfection of gRNA into the cells, 3-[4, 5-methylthiazol-2-yl]-2, 5-diphenyl-tetrazolium bromide (MTT) (Ruibio: Zhejiang, China) assay kit was used to determine the number of viable A549 cells. In brief, 1 x 10<sup>4</sup> A549 cells were seeded in a 96-well plate and incubated at 37°C for 24 h. The plate was divided into 6 test groups with triplicates containing reduced serum medium (Opti-MEM™ I, New York, USA). The test groups include the components used for transfection, i.e. Hs.Cas9. MMP20.1.AA sgRNA, Hs.Cas9.MMP20.1.AB sgRNA, Cas9 protein, Cas9 plus reagent, Lipofectamine CRISPRMAX, and blank (non-transfected cells). The plate was then incubated at 37°C for two days. After 48 h, 40  $\mu$ L of MTT reagent was added to each well and incubated for 4 h at 37°C to allow development of reaction. At the end of reaction, the newly formed formazan crystals were dissolved with 100  $\mu$ L DMSO and absorbance was recorded at 570 nm (with reference at 670 nm).

## 2.7 Statistical analysis

The quantitative data were stated as mean values  $\pm$  standard deviation (SD). The differences in gene expression between transfected and non-transfected cells were determined by two-tailed t-test and confirmed to be significant if the *p*-value was less than 0.05.

## 3.0 Results

### 3.1 Transfected cells demonstrated lower expression of genes involved in survivability

To determine the knock-down effect of *MMP20* gene on A549 cell survivability, we used RT-PCR to quantitatively measure mRNA gene expression of *PI3-K*, *survivin* and *MAP-K* in the transfected cells. The changes in gene expressions after transfection were expressed as relative fold gene expression against non-transfected cells. This was performed by normalising the gene expression level with  $\beta$ -*actin* as internal control and compared with non-transfected cells.

As represented in Fig 1A, cells transfected with Hs.Cas9.MMP20.1.AA and Hs.Cas9.MMP20.1.AB expressed *PI3-K* at 0.78 (*p* = 0.049) and 0.70-fold (*p* = 0.033) lower level than non-transfected cells, respectively. Meanwhile, Fig 1B also shows these transfected cell groups

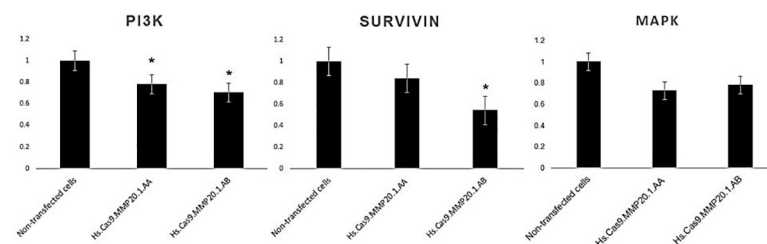

**Fig 1.** Fold changes in gene expression of *PI3-K* (A), *survivin* (B) and *MAPK* (C) in the test groups transfected with Hs.Cas9.MMP20.1.AA and Hs.Cas9.MMP20.1.AB gRNAs, respectively.

<https://doi.org/10.1371/journal.pone.0250552.g001>

expressed *survivin* at 0.84 ( $p > 0.05$ ) and 0.54 ( $p = 0.017$ ) fold lower than transfected cells. For *MAPK* gene expression (Fig 1C), the cells did not undergo significant level of changes after transfection with each of these single gRNA.

### 3.2 Knock-down of *MMP20* gene led to A549 cell apoptosis

To determine the effects of transfection on cell apoptosis, AO/PI double staining was performed after 48 h. The living nucleated cells would stain green, whereas dead nucleated cells would stain red.

In contrast to non-transfected cells which showed high cell viability (Fig 2A), the cells transfected with Hs.Cas9.MMP20.1.AA gRNA presented early apoptotic changes with appearance of membrane blebbing (Fig 2B). Meanwhile, Hs.Cas9.MMP20.1.AB gRNA-transfected cells showed presence of many red nucleated cells, depicting an advanced stage of apoptosis (Fig 2C).

To confirm that the cell apoptosis was not caused by the transfection method itself, the cytotoxicity of each transfection component (Hs.Cas9.MMP20.1.AA, Hs.Cas9.MMP20.1.AB, Cas9 protein, Cas9 plus reagent and Lipofectamine CRISPRMAX) following 48 h of incubation on A549 cell line was assessed through MTT assay. This experiment confirmed that the cell necrosis and apoptosis were specific to the *MMP20* knock-down by the delivery of the ribonucleoprotein complexes into the cells. The results did not indicate any significant increase in cell death when cells were transfected with Cas9 protein and compared with non-transfected control group ( $p > 0.05$ ). (Fig 3).

### 3.3 Transfected cells showed a decrease in cell migration

To affirm that apoptosis event was a direct effect of successful knock-down of *MMP20* gene, a cell migration assay was performed. It was expected that the reduced expression of *MMP20* gene would lead to a decrease in cell motility.

The results presented in Figs 4 and 5 depicted the changes in cell migration activity in non-transfected, Hs.Cas9.MMP20.1.AA and Hs.Cas9.MMP20.1.AB gRNA-transfected cells, respectively. Fig 4 showed a wider wound in both transfected cell groups (Fig 4B and 4C) after 48 h compared to non-transfected cells (Fig 4A), indicating curbing of cell migration in transfected cell groups. After the analysis of the micrographs using ImageJ software, the rate of cell migration was decreased in Hs.Cas9.MMP20.1.AA and Hs.Cas9.MMP20.1.AB when compared to non-transfected cells (Fig 5). However, the decreases were not significant.

## 4.0 Discussion

The role of major MMPs is mostly associated to tissue patterning during organogenesis, repair and orchestration of immune response [2]. Previous reports have examined that *MMP20* levels

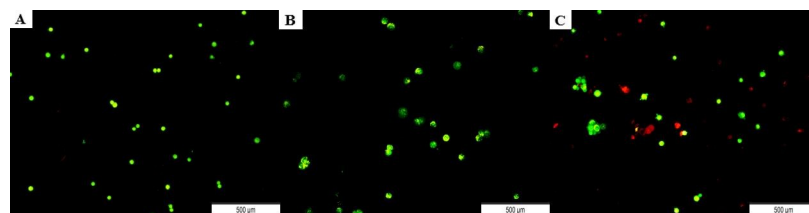

**Fig 2. Microscopic observation of apoptosis in A549 cells 48 h post-transfection.** AO/PI double staining was performed on non-transfected cells (A) and cells transfected with Hs.Cas9.MMP20.1.AA gRNA (B), and Hs.Cas9.MMP20.1.AB gRNA (C). All the images were taken with a magnification of  $\times 400$ . Scale 500  $\mu\text{m}$ .

<https://doi.org/10.1371/journal.pone.0250552.g002>

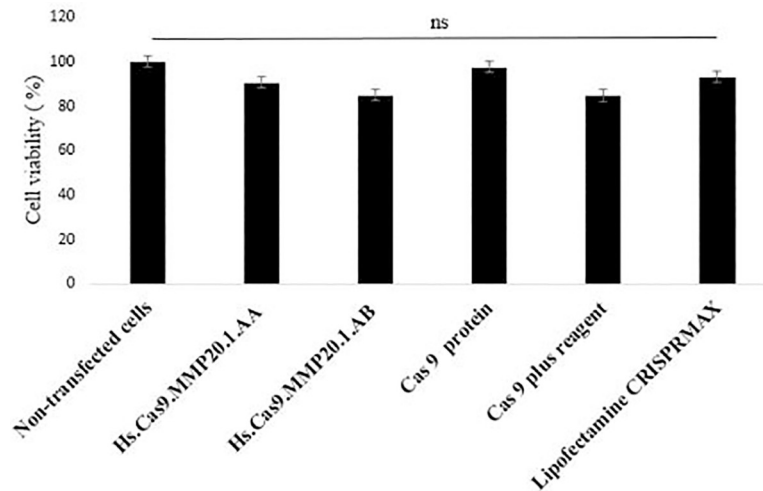

**Fig 3. Cytotoxic effect of CRISPR-Cas9 reaction components on A549 cells lines.** Cells were treated with individual reaction components for 48 h and the cell viability was determined by MTT assay. The data were expressed as mean values  $\pm$  Standard Error of the Mean (S.E.M) of viable cells (n = 3).

<https://doi.org/10.1371/journal.pone.0250552.g003>

remain unchanged during lung development, however, the expression was highly upregulated upon acquiring tumoral properties [10]. High secretion of MMP could confer metastatic activity to the cells, thus leading to spread of cancer cells to distant sites in the body [8, 11]. Thus, it is interesting to determine the interaction of MMP20 with other signalling molecules in lung adenocarcinoma and the cellular behavioural changes after MMP20 knock-down.

The current study demonstrated that knock-down of *MMP20* gene in A549 lung adenocarcinoma cells was accompanied by a reduction of cell survivability, as shown in the AO/PI stains (Fig 2) and migratory activities (Figs 4 and 5). Real-Time quantitative PCR demonstrated down-regulation of *PI3-K*, *survivin* and *MAP-K* genes in the cells (Fig 1). The results we reported herein should be considered in the light of some limitations. Firstly, the downregulation of *MAP-K* was not considered significant with each of the gRNAs. Secondly, the expression of *survivin* was significantly downregulated only by Hs.Cas9.MMP20.1.AB. Since the gRNAs targeted only at one site in *MMP20* gene, the DNA could have repaired themselves

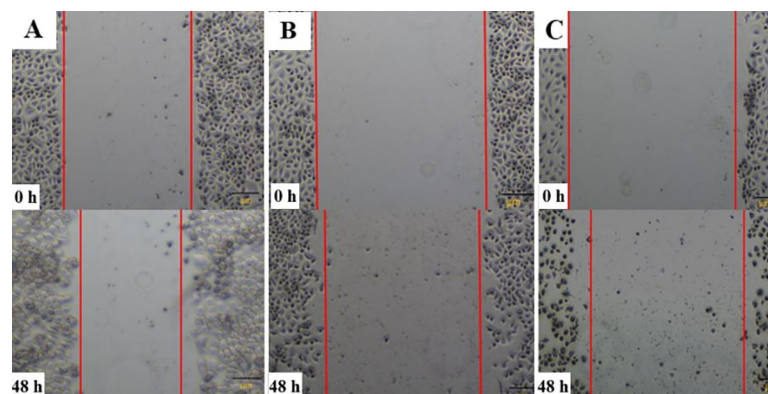

**Fig 4. Comparison of wound gap between transfected and non-transfected cells.** Wound healing assay was used to compare the ability of cells between the test groups to close the wound created on monolayer cells. The micrographs were taken for non-transfected (A), Hs.Cas9.MMP20.1.AA (B), and Hs.Cas9.MMP20.1.AB (C) transfected cells at 0 h and 48 h after creating the wound in the monolayer cells. All the images were taken with a magnification of  $\times 400$ .

<https://doi.org/10.1371/journal.pone.0250552.g004>

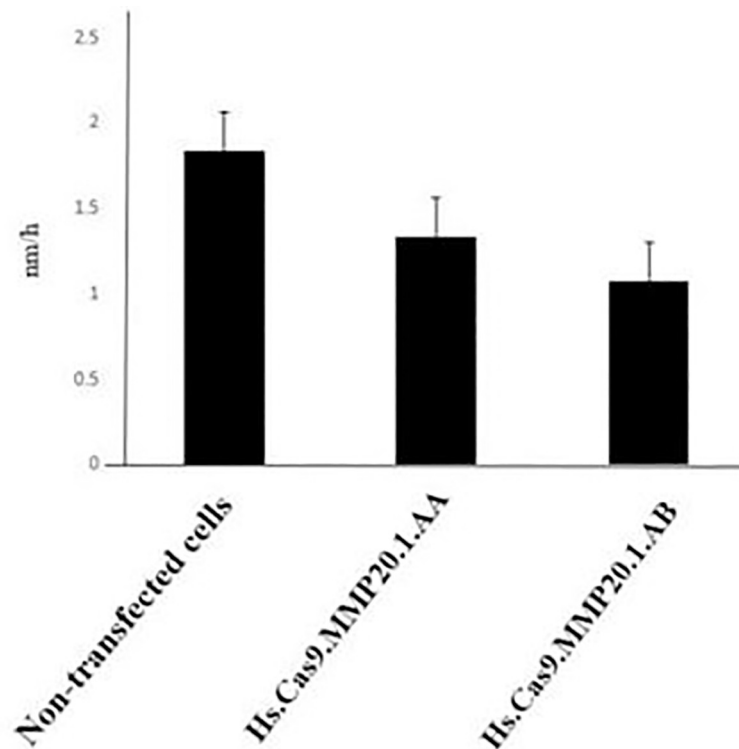

**Fig 5. Rate of cell migration.** After 48 h of transfection, the gap between the edges of the wound was analysed with ImageJ software, and the rate of cell migration was calculated and represented as the distance of cell migration within one hour (nm/h). The cells transfected with either Hs.Cas9.MMP20.1.AA or Hs.Cas9.MMP20.1.AB gRNA showed reduction in its migration rate when compared to non-transfected cells (n = 3).

<https://doi.org/10.1371/journal.pone.0250552.g005>

following the double strand breaks made by the Cas9 in complex with the gRNAs [12]. It is also possible that the transfection methods, in particular, the concentration and variant of Cas protein used in this study, could have resulted in such a finding. Further optimization of transfection methods may improve the significance in gene expression differences between the transfected and non-transfected cells.

Literature reviews have shown that *PI3-K* [13–16], *survivin* [17, 18] and *MAP-K* activation [19, 20] are essential for cell proliferation. It is also possible that inhibition of *MMP20* may inactivate the *WNT/β-catenin* signalling pathway [19] leading to reduction in cell proliferation. In addition to that, *WNT* signalling pathway is also responsible to promote cell motility and invasion through extracellular matrix such as Matrigel [21]. One study showed that knock-down of *MMP20* gene expression in several ovarian cancer cell lines correlated with decreases in cell invasion abilities [22]. Taken together, it is rationale to speculate that *MMP20* may have modulatory properties on cell cycle that leads to uncontrolled cell proliferation in cancer development, in addition to its role in cell metastasis.

It is noteworthy that *PI3-K/AKT/c-myc* signalling pathway plays pivotal role in initial lung development, and maintenance of lung cell stemness vital for tissue repair in adults [23]. *C-myc* transcription factor is an important component in the Yamanaka factors required to reprogram somatic cells to pluripotent state [24]. This signalling pathway is re-activated when cells switch to aberrant cell type as in cancer formation [24]. It is unclear whether or not *MMP20* upregulation occurs after cells acquire tumoral properties, however, our study clearly showed that *MMP20* regulates *PI3-K*, and possibly *c-myc* gene activities. This is in agreement

with previous report by Nikitakis *et al.*, which demonstrated that *MMP20* has a governing role on the maintenance of cancer stem cell (CSC) in human oral cancer cells (OCCs) [25]. When *MMP20* was silenced, the CSC markers such as ALDH1, BM1, CD44, LGR4 and CD133 were down-regulated in human OCCs.

To our knowledge, the present findings are the first to report on direct changes in cellular behaviour of human lung adenocarcinoma, particularly on migratory activity, following inhibition of *MMP20* gene expression, and provides a link to molecular function of *MMP20* in cancer cell survivability. These findings implicate that *MMP20* might regulate numerous signalling pathways that promote cancer development and progression, and should be confirmed with a Next-Generation Sequencing study. Also, future efforts should explore targeting *MMP20* gene as a form of treatment for lung adenocarcinoma.

Current mode of treatment for lung cancer includes surgery, radio- and chemotherapy, and prescription of targeted inhibitor drugs such as cisplatin, bevacizumab, entrectinib, erlotinib and cetuximab, to the patients [10, 11, 26]. Despite that, these treatments resulted in poor prognosis and low five-year survival rate [27].

Since the discovery of CRISPR-Cas9 in bacterial immune system [28], CRISPR-Cas9 has been adapted into a powerful tool for cancer genomic research [29, 30]. Over the past decade, the CRISPR-Cas9 technology has become a popular technique for genome editing because it is rapid, cost-effective, precise and relatively easy to perform [31]. In lung cancer research, CRISPR-Cas9-mediated gene knockout of *Bcl-2 interacting cell death suppressor (BIS)* has demonstrated a substantial decrease in survival to cisplatin treatment in A549 cells [32]. Other than that, it has also been used to make modifications in somatic cells including stem and germline cells for correcting various diseases such as pulmonary diseases [33], gastrointestinal disorders [34, 35], haematological diseases [36–38] viral diseases [39–41], vector diseases [42, 43], autoimmune and inflammatory diseases [44, 45]. The safety of CRISPR-based therapy for precise gene targeting is currently evaluated in clinical trials [46], and may be potentially useful for cancer targeting.

## Conclusion

The knock-down of *MMP20* gene in human A549 lung adenocarcinoma could trigger cell death and decrease cell migration in the *in vitro* assay. *MMP20* is involved in the regulation of *PI3-K*, *survivin* and *MAP-K* gene expressions. Specific targeting on *MMP20* gene could potentially provide an efficient form of treatment to halt lung adenocarcinoma progression. More studies should be carried out in the future to evaluate the safety and efficiency of CRISPR-Cas technologies for knocking down *MMP20* gene in lung adenocarcinoma animal models.

## Acknowledgments

The authors acknowledge the National Institute of Health (IMR) Malaysia for providing the A549 cell line.

## Author Contributions

**Data curation:** Hernandez Maradiaga Oscar David, Gothai Sivaprakasam, Avin Ee-Hwan Koh.

**Formal analysis:** Hernandez Maradiaga Oscar David, Aisha Farhana, Mohammed Safwan Ali Khan, Gothai Sivaprakasam, Avin Ee-Hwan Koh, Badr Alzahrani.

**Funding acquisition:** Pooi Ling Mok.



**Investigation:** Arun Neela Kumar Anandasayanam, Hernandez Maradiaga Oscar David, Jiabei Tong, Gothai Sivaprakasam.

**Methodology:** Pooi Ling Mok, Hernandez Maradiaga Oscar David, Jiabei Tong, Gothai Sivaprakasam.

**Resources:** Pooi Ling Mok.

**Software:** Avin Ee-Hwan Koh.

**Supervision:** Pooi Ling Mok.

**Visualization:** Avin Ee-Hwan Koh.

**Writing – original draft:** Pooi Ling Mok, Hernandez Maradiaga Oscar David.

**Writing – review & editing:** Pooi Ling Mok, Jiabei Tong, Aisha Farhana, Mohammed Safwan Ali Khan, Gothai Sivaprakasam, Avin Ee-Hwan Koh, Badr Alzahrani.

## References

1. Gómez-Piña V, Martínez E, Fernández-Ruiz I, Del Fresno C, Soares-Schanoski A, Jurado T, et al. Role of MMPs in orchestrating inflammatory response in human monocytes via a TREM-1-PI3K-NF- $\kappa$ B pathway. *J Leukoc Biol*. 2012 Jun; 91(6):933–45. <https://doi.org/10.1189/jlb.0711340> PMID: 22459945
2. Greenlee KJ, Werb Z, Kheradmand F. Matrix metalloproteinases in lung: multiple, multifarious, and multifaceted. *Physiol Rev*. 2007 Jan; 87(1):69–98. <https://doi.org/10.1152/physrev.00022.2006> PMID: 17237343
3. Lee H-W, Park S-H, Weng M, Wang H-T, Huang W, Lepor H, et al. E-cigarette smoke damages DNA and reduces repair activity in mouse lung, heart, and bladder as well as in human lung and bladder cells. *Proc Natl Acad Sci*. 2018 Jan; 115(7):E1560–9. <https://doi.org/10.1073/pnas.1718185115> PMID: 29378943
4. O’Keeffe LM, Taylor G, Huxley RR, Mitchell P, Woodward M, Peters SAE. Smoking as a risk factor for lung cancer in women and men: a systematic review and meta-analysis. *BMJ Open*. 2018 Oct; 8(10):e021611. <https://doi.org/10.1136/bmjopen-2018-021611> PMID: 30287668
5. Saito R, Miki Y, Ishida N, Inoue C, Kobayashi M, Hata S, et al. The Significance of MMP-1 in EGFR-TKI-Resistant Lung Adenocarcinoma: Potential for Therapeutic Targeting. *Int J Mol Sci* [Internet]. 2018 Feb 18 [cited 2021 Mar 8]; 19(2):609. Available from: <http://www.mdpi.com/1422-0067/19/2/609>. <https://doi.org/10.3390/ijms19020609> PMID: 29463039
6. Cai X, Zhu H, Li Y. PKC $\xi$ , MMP-2 and MMP-9 expression in lung adenocarcinoma and association with a metastatic phenotype. *Mol Med Rep* [Internet]. 2017 Dec 1 [cited 2021 Mar 8]; 16(6):8301–6. Available from: <http://www.spandidos-publications.com/10.3892/mmr.2017.7634/abstract>. <https://doi.org/10.3892/mmr.2017.7634> PMID: 28983601
7. Shih YW, Chien ST, Chen PS, Lee JH, Wu SH, Yin L Te.  $\alpha$ -Mangostin Suppresses Phorbol 12-myristate 13-acetate-induced MMP-2/MMP-9 Expressions via  $\alpha$ v $\beta$ 3 Integrin/FAK/ERK and NF- $\kappa$ B Signaling Pathway in Human Lung Adenocarcinoma A549 Cells. *Cell Biochem Biophys* [Internet]. 2010 Jul 23 [cited 2021 Mar 8]; 58(1):31–44. Available from: <https://link.springer.com/article/10.1007/s12013-010-9091-2>. <https://doi.org/10.1007/s12013-010-9091-2> PMID: 20652762
8. Rivas EC, Ramos MCP. The role of enamelysin (mmp-20) in tooth development. Systematic review. *Rev Fac Odontol Univ Antioquia*. 2015 Nov; 27(1).
9. Kim J-W, Simmer JP, Hart TC, Hart PS, Ramaswami MD, Bartlett JD, et al. MMP-20 mutation in autosomal recessive pigmented hypomaturation amelogenesis imperfecta. *J Med Genet*. 2005 Mar; 42(3):271–5. <https://doi.org/10.1136/jmg.2004.024505> PMID: 15744043
10. Expression Pattern of Matrix Metalloproteinase 20 (MMP20) in Human Tumors [Internet]. [cited 2020 Oct 22]. Available from: <http://ar.iijournals.org/content/36/6/2713.short>.
11. Gonzalez-Avila G, Sommer B, Mendoza-Posada DA, Ramos C, Garcia-Hernandez AA, Falfan-Valencia R. Matrix metalloproteinases participation in the metastatic process and their diagnostic and therapeutic applications in cancer. Vol. 137, *Critical Reviews in Oncology/Hematology*. Elsevier Ireland Ltd; 2019. p. 57–83. <https://doi.org/10.1016/j.critrevonc.2019.02.010> PMID: 31014516
12. Uddin F, Rudin CM, Sen T. CRISPR Gene Therapy: Applications, Limitations, and Implications for the Future [Internet]. Vol. 10, *Frontiers in Oncology*. Frontiers Media S.A.; 2020 [cited 2021 Mar 20]. p.

1387. Available from: /pmc/articles/PMC7427626/. <https://doi.org/10.3389/fonc.2020.01387> PMID: 32850447
13. Castellano E, Molina-Arcas M, Krygowska AA, East P, Warne P, Nicol A, et al. RAS signalling through PI3-Kinase controls cell migration via modulation of Reelin expression. *Nat Commun* [Internet]. 2016 Apr 13 [cited 2020 Nov 24]; 7(1):1–13. Available from: [www.nature.com/naturecommunications](http://www.nature.com/naturecommunications). <https://doi.org/10.1038/ncomms11245> PMID: 27071537
  14. Gialeli C, Theocharis AD, Karamanos NK. Roles of matrix metalloproteinases in cancer progression and their pharmacological targeting. *FEBS J* [Internet]. 2011 Jan 1; 278(1):16–27. Available from: <https://doi.org/10.1111/j.1742-4658.2010.07919.x> PMID: 21087457
  15. Matsuoka T, Yashiro M, Nishioka N, Hirakawa K, Olden K, Roberts JD. PI3K/Akt signalling is required for the attachment and spreading, and growth in vivo of metastatic scirrhus gastric carcinoma. *Br J Cancer* [Internet]. 2012 Apr 24 [cited 2020 Oct 22]; 106(9):1535–42. Available from: [www.bjancer.com](http://www.bjancer.com). <https://doi.org/10.1038/bjc.2012.107> PMID: 22531720
  16. Plosa EJ, Benjamin JT, Sucre JM, Gulleman PM, Gleaves LA, Han W, et al.  $\beta$ 1 Integrin regulates adult lung alveolar epithelial cell inflammation. *JCI Insight* [Internet]. 2020 Jan 30; 5(2). Available from: <https://doi.org/10.1172/jci.insight.129259> PMID: 31873073
  17. Tong X, Yang P, Wang K, Liu Y, Liu X, Shan X, et al. Survivin is a prognostic indicator in glioblastoma and may be a target of microRNA-218. *Oncol Lett* [Internet]. 2019 Jul 1 [cited 2020 Nov 24]; 18(1):359–67. Available from: <https://doi.org/10.3892/ol.2019.10335> PMID: 31289507
  18. Warriar NM, Agarwal P, Kumar P. Emerging Importance of Survivin in Stem Cells and Cancer: the Development of New Cancer Therapeutics [Internet]. Vol. 16, *Stem Cell Reviews and Reports*. Springer; 2020 [cited 2020 Nov 24]. p. 828–52. Available from: <https://doi.org/10.1007/s12015-020-09995-4> PMID: 32691369
  19. Das K, Prasad R, Ansari SA, Roy A, Mukherjee A, Sen P. Matrix metalloproteinase-2: A key regulator in coagulation proteases mediated human breast cancer progression through autocrine signaling. *Biomed Pharmacother*. 2018 Sep 1; 105:395–406. <https://doi.org/10.1016/j.biopha.2018.05.155> PMID: 29870887
  20. Reddy KB, Nabha SM, Atanaskova N. Role of MAP kinase in tumor progression and invasion [Internet]. Vol. 22, *Cancer and Metastasis Reviews*. Springer; 2003 [cited 2020 Sep 29]. p. 395–403. Available from: <https://doi.org/10.1023/a:1023781114568> PMID: 12884914
  21. Shin M, Chavez MB, Ikeda A, Foster BL, Bartlett JD. MMP20 Overexpression Disrupts Molar Ameloblast Polarity and Migration. *J Dent Res* [Internet]. 2018 Jul 1 [cited 2020 Nov 24]; 97(7):820–7. Available from: <https://pubmed.ncbi.nlm.nih.gov/29481294/>. <https://doi.org/10.1177/0022034518758657> PMID: 29481294
  22. Wang S, Jia J, Liu D, Wang M, Wang Z, Li X, et al. Matrix Metalloproteinase Expressions Play Important role in Prediction of Ovarian Cancer Outcome. *Sci Rep*. 2019 Aug;9. <https://doi.org/10.1038/s41598-019-47871-5> PMID: 31406154
  23. Wang J, Ito T, Udaka N, Okudela K, Yazawa T, Kitamura H. PI3K-AKT pathway mediates growth and survival signals during development of fetal mouse lung. *Tissue Cell*. 2005 Mar; 37:25–35. <https://doi.org/10.1016/j.tice.2004.09.002> PMID: 15695173
  24. Müller M, Hermann P, Liebau S, Hartmann C, Seufferlein T, Kleger A, et al. The role of pluripotency factors to drive stemness in gastrointestinal cancer. *Stem Cell Res*. 2016 Feb; 16(2):349–57. <https://doi.org/10.1016/j.scr.2016.02.005> PMID: 26896855
  25. Nikitakis NG, Gkouveris I, Aseervatham J, Barahona K, Ogbureke KJE. DSPP-MMP20 gene silencing downregulates cancer stem cell markers in human oral cancer cells. *Cell Mol Biol Lett* [Internet]. 2018 Dec 11 [cited 2020 Nov 24]; 23(1):30. Available from: <https://cmbl.biomedcentral.com/articles/10.1186/s11658-018-0096-y>. <https://doi.org/10.1186/s11658-018-0096-y> PMID: 30002682
  26. Barta JA, Powell CA, Wisnivesky JP. Global epidemiology of lung cancer [Internet]. Vol. 85, *Annals of Global Health*. Ubiquity Press; 2019 [cited 2020 Oct 22]. Available from: /pmc/articles/PMC6724220/?report=abstract.
  27. Yang B, Lee H, Um S-W, Kim K, Zo J II, Shim YM, et al. Incidence of brain metastasis in lung adenocarcinoma at initial diagnosis on the basis of stage and genetic alterations. *Lung Cancer* [Internet]. 2019 Mar 1 [cited 2020 Jan 24]; 129:28–34. Available from: <http://www.ncbi.nlm.nih.gov/pubmed/30797488>. <https://doi.org/10.1016/j.lungcan.2018.12.027> PMID: 30797488
  28. Ishino Y, Shinagawa H, Makino K, Amemura M, Nakamura A. Nucleotide sequence of the iap gene, responsible for alkaline phosphatase isoenzyme conversion in *Escherichia coli*, and identification of the gene product. *J Bacteriol* [Internet]. 1987 Dec 1 [cited 2020 Sep 7]; 169(12):5429–33. Available from: <http://jb.asm.org/>. <https://doi.org/10.1128/jb.169.12.5429-5433.1987> PMID: 3316184
  29. Hoellerbauer PF, Paddison PJ, Cooper JA, Holland EC. Identification of Genetic Vulnerabilities in Glioblastoma and Other Cancers Using CRISPR-Cas9-based Functional Genomic Approaches [Internet].

- 2020 [cited 2020 Sep 10]. Available from: <https://digital.lib.washington.edu/443/researchworks/handle/1773/46125>.
30. Jiang F, Liang Y, Wei W, Zou C, Chen G, Wan Y, et al. Functional classification of prostate cancer-associated miRNAs through CRISPR/Cas9-mediated gene knockout. *Mol Med Rep* [Internet]. 2020 Sep 7 [cited 2020 Sep 12]; Available from: <http://www.spandidos-publications.com/10.3892/mmr.2020.11491>. <https://doi.org/10.3892/mmr.2020.11491> PMID: 32901864
  31. Lee JK, Jeong E, Lee J, Jung M, Shin E, hoon Kim Y, et al. Directed evolution of CRISPR-Cas9 to increase its specificity. *Nat Commun* [Internet]. 2018 Dec 1 [cited 2020 Sep 7]; 9(1):1–10. Available from: [www.nature.com/naturecommunications](http://www.nature.com/naturecommunications). <https://doi.org/10.1038/s41467-017-02088-w> PMID: 29317637
  32. Cui MN, Yun HH, Lee NE, Kim HY, Im CN, Kim YS, et al. Depletion of BIS sensitizes A549 cells to treatment with cisplatin. *Mol Cell Toxicol* [Internet]. 2016 Mar 1 [cited 2020 Oct 30]; 12(1):63–71. Available from: <https://link.springer.com/article/10.1007/s13273-016-0009-y>.
  33. Schwank G, Koo BK, Sasselli V, Dekkers JF, Heo I, Demircan T, et al. Functional repair of CFTR by CRISPR/Cas9 in intestinal stem cell organoids of cystic fibrosis patients. *Cell Stem Cell* [Internet]. 2013 Dec 5 [cited 2020 Sep 23]; 13(6):653–8. Available from: <https://pubmed.ncbi.nlm.nih.gov/24315439/> <https://doi.org/10.1016/j.stem.2013.11.002> PMID: 24315439
  34. Pankowicz FP, Barzi M, Legras X, Hubert L, Mi T, Tomolonis JA, et al. Reprogramming metabolic pathways in vivo with CRISPR/Cas9 genome editing to treat hereditary tyrosinaemia. *Nat Commun* [Internet]. 2016 Aug 30 [cited 2020 Sep 23]; 7. Available from: <https://pubmed.ncbi.nlm.nih.gov/27572891/>. <https://doi.org/10.1038/ncomms12642> PMID: 27572891
  35. Yin H, Xue W, Chen S, Bogorad RL, Benedetti E, Grompe M, et al. Genome editing with Cas9 in adult mice corrects a disease mutation and phenotype. *Nat Biotechnol* [Internet]. 2014 [cited 2020 Sep 23]; 32(6):551–3. Available from: <https://pubmed.ncbi.nlm.nih.gov/24681508/>. <https://doi.org/10.1038/nbt.2884> PMID: 24681508
  36. Dever DP, Bak RO, Reinisch A, Camarena J, Washington G, Nicolas CE, et al. CRISPR/Cas9  $\beta$ -globin gene targeting in human haematopoietic stem cells. *Nature* [Internet]. 2016 [cited 2020 Sep 23]; 539 (7629):384–9. Available from: <https://pubmed.ncbi.nlm.nih.gov/27820943/>. <https://doi.org/10.1038/nature20134> PMID: 27820943
  37. Ou Z, Niu X, He W, Chen Y, Song B, Xian Y, et al. The Combination of CRISPR/Cas9 and iPSC Technologies in the Gene Therapy of Human  $\beta$ -thalassaemia in Mice. *Sci Rep* [Internet]. 2016 Sep 1 [cited 2020 Sep 23]; 6. Available from: <https://pubmed.ncbi.nlm.nih.gov/28442741/>. <https://doi.org/10.1038/s41598-016-0015-2> PMID: 28442741
  38. Zhang N, Zhi H, Curtis BR, Rao S, Jobaliya C, Poncz M, et al. CRISPR/Cas9-mediated conversion of human platelet alloantigen allotypes. *Blood* [Internet]. 2016 Feb 11 [cited 2020 Sep 23]; 127(6):675–80. Available from: <https://ashpublications.org/blood/article-pdf/127/6/675/1394419/675.pdf>. <https://doi.org/10.1182/blood-2015-10-675751> PMID: 26634302
  39. Kennedy EM, Kornepati AVR, Goldstein M, Bogerd HP, Poling BC, Whisnant AW, et al. Inactivation of the Human Papillomavirus E6 or E7 Gene in Cervical Carcinoma Cells by Using a Bacterial CRISPR/Cas RNA-Guided Endonuclease. *J Virol* [Internet]. 2014 Oct 15 [cited 2020 Sep 23]; 88(20):11965–72. Available from: <https://pubmed.ncbi.nlm.nih.gov/25100830/>. <https://doi.org/10.1128/JVI.01879-14> PMID: 25100830
  40. Puschnik AS, Majzoub K, Ooi YS, Carette JE. A CRISPR toolbox to study virus-host interactions [Internet]. Vol. 15, *Nature Reviews Microbiology*. Nature Publishing Group; 2017 [cited 2020 Sep 23]. p. 351–64. Available from: <https://pubmed.ncbi.nlm.nih.gov/28420884/>. <https://doi.org/10.1038/nrmicro.2017.29> PMID: 28420884
  41. Zhen S, Hua L, Takahashi Y, Narita S, Liu YH, Li Y. In vitro and in vivo growth suppression of human papillomavirus 16-positive cervical cancer cells by CRISPR/Cas9. *Biochem Biophys Res Commun* [Internet]. 2014 Aug 8 [cited 2020 Sep 23]; 450(4):1422–6. Available from: <https://pubmed.ncbi.nlm.nih.gov/25044113/>. <https://doi.org/10.1016/j.bbrc.2014.07.014> PMID: 25044113
  42. Kistler KE, Vosshall LB, Matthews BJ. Genome engineering with CRISPR-Cas9 in the mosquito aedes aegypti. *Cell Rep* [Internet]. 2015 Apr 7 [cited 2020 Sep 23]; 11(1):51–60. Available from: <https://pubmed.ncbi.nlm.nih.gov/25818303/>. <https://doi.org/10.1016/j.celrep.2015.03.009> PMID: 25818303
  43. Zhang C, Xiao B, Jiang Y, Zhao Y, Li Z, Gao H, et al. Efficient editing of malaria parasite genome using the CRISPR/Cas9 system. *MBio* [Internet]. 2014 Jul 1 [cited 2020 Sep 23]; 5(4). Available from: <https://pubmed.ncbi.nlm.nih.gov/24987097/>. <https://doi.org/10.1128/mBio.01414-14> PMID: 24987097
  44. Brunger JM, Zutshi A, Willard VP, Gersbach CA, Guilak F. Genome Engineering of Stem Cells for Autonomously Regulated, Closed-Loop Delivery of Biologic Drugs. *Stem Cell Reports* [Internet]. 2017 May 9 [cited 2020 Sep 23]; 8(5):1202–13. Available from: <https://pubmed.ncbi.nlm.nih.gov/28457885/>. <https://doi.org/10.1016/j.stemcr.2017.03.022> PMID: 28457885

45. Tang S, Chen T, Yu Z, Zhu X, Yang M, Xie B, et al. RasGRP3 limits Toll-like receptor-triggered inflammatory response in macrophages by activating Rap1 small GTPase. *Nat Commun* [Internet]. 2014 Aug 14 [cited 2020 Sep 23];5. Available from: <https://pubmed.ncbi.nlm.nih.gov/25118589/>. <https://doi.org/10.1038/ncomms5657> PMID: 25118589
46. Hirakawa MP, Krishnakumar R, Timlin JA, Carney JP, Butler KS. Gene editing and CRISPR in the clinic: Current and future perspectives [Internet]. Vol. 40, *Bioscience Reports*. Portland Press Ltd; 2020 [cited 2020 Nov 24]. Available from: [/pmc/articles/PMC7146048/?report = abstract](https://pubmed.ncbi.nlm.nih.gov/328146048/).
